# Supplementary material for: The oxylipin and endocannabidome responses in acute phase Plasmodium falciparum malaria in children
Source: Springer Nature journal article supplement (doi:10.1186/s12936-017-2001-y), 2017-09-08
Supplement: MOESM1 [file 15032096]

## Additional file 1

### The oxylipin and endocannabinoidome responses in acute phase *Plasmodium falciparum* malaria in children

**Table.** Clinical information for the control patients included in the study (\*). In bold marked samples analyzed for endocannabinoids content (see Methods section).

| Study code     | Age         | Gender | Blood pressure | HC in cm | Weight in kg | Height in cm | MUAC in cm | Temperature | Pulse rate | Breathing rate | Date of recruitment |
|----------------|-------------|--------|----------------|----------|--------------|--------------|------------|-------------|------------|----------------|---------------------|
| <b>NYC-76</b>  | 1 YR 1 MON  | M      | 90/70          | 46       | 8            | 76           | 15         | 36.7        | 112        | 24             | 17/08/2012          |
| <b>NYC-112</b> | 1 YR 1 MON  | F      | 100/80         | 51       | 13           | 89           | 17         | 37.4        | 98         | 24             | 22/08/2012          |
| <b>NYC-117</b> | 5 YR        | F      | 100/85         | 49       | 20           | 117          | 16         | 37.2        | 92         | 24             | 22/08/2012          |
| <b>NYC-118</b> | 2 YR        | M      | 110/75         | 51       | 12           | 98           | 16         | 37.4        | 102        | 24             | 22/08/2012          |
| <b>NYC-123</b> | 2 YR 6 MON  | F      | 120/85         | 49       | 14           | 93           | 17         | 37          | 94         | 20             | 22/08/2012          |
| <b>NYC-141</b> | 3 YR        | M      | 118/69         | 51       | 13           | 90           | 16         | 36.4        | 99         | 25             | 06/12/2012          |
| <b>NYC-144</b> | 2 YR 11 MON | F      | NA             | 51       | 13           | 91           | 16         | 36.4        | 107        | 26             | 06/12/2012          |
| <b>NYC-150</b> | 2 YR 6 MON  | F      | NA             | 47       | 13           | 89           | 17         | 36.9        | 106        | 24             | 07/12/2012          |
| <b>NYC-161</b> | 4YR         | M      | 100/70         | 50.5     | 13           | 95           | 15         | 36.3        | 101        | 12             | 18/04/2013          |
| <b>NYC-177</b> | 2 YR 6 M    | F      | 100/50         | 47       | 10           | 87           | 15         | 36.5        | 120        | 22             | 24/04/2013          |
| <b>NYC-178</b> | 5 YR        | M      | 115/90         | 50       | 15           | 90           | 17         | 36.36       | 104        | 34             | 24/04/2013          |
| <b>NYC-180</b> | 2 YR        | M      | 90/90          | 48       | 9            | 84           | 14         | 36.1        | 100        | 30             | 25/04/2013          |
| <b>NYC-184</b> | 3 YR 7M     | M      | 100/70         | 51       | 15           | 100          | 16         | 36.96       | 50         | 24             | 25/05/2013          |
| <b>NYC-189</b> | 4 YR        | F      | 115/70         | 48.5     | 15           | 106          | 15.5       | 36.5        | 94         | 18             | 26/04/2013          |
| <b>NYC-214</b> | 5 YR 3 M    | M      | 122/96         | 52       | 21           | 115          | 16         | 36.9        | 102        | 26             | 08/07/2013          |
| <b>NYC-215</b> | 5 YR 6 M    | F      | 124/98         | 52       | 18           | 105          | 15         | 36.6        | 84         | 24             | 07/08/2013          |
| <b>NYC-216</b> | 4YR         | F      | 108/86         | 51       | 18           | 105          | 16         | 36.7        | 94         | 24             | 07/08/2013          |
| <b>NYC-231</b> | 3 YR 6 M    | F      | NA             | 51       | 16           | 99           | 17         | 37          | NA         | NA             | 23/12/2013          |
| <b>NYC-232</b> | 4 YR        | M      | 100/80         | 53       | 17           | 102          | 19         | 37          | 89         | 21             | 23/12/2013          |
| <b>NYC-249</b> | 6M          | M      | 100/70         | 49       | 19           | 118          | 16         | 36.8        | 84         | 19             | 01/05/2014          |

(\*). All children except NYC-189 were vaccinated and had negative or unknown HIV serostatus. HC - head circumference; MUAC - mid-upper arm circumference, NA- not assessed
