# Supplementary material for: The oxylipin and endocannabidome responses in acute phase Plasmodium falciparum malaria in children
Source: Springer Nature journal article supplement (doi:10.1186/s12936-017-2001-y), 2017-09-08
Supplement: MOESM2 [file 15032096]

## Additional file 2

### The oxylin and endocannabidome responses in acute phase *Plasmodium falciparum* malaria in children

**Table.** Clinical information for the uncomplicated malaria patients included in the study. In bold marked samples analyzed for endocannabinoids content (see Methods section).

| Study code     | Age (months) | Gender | Vaccination status | Blood pressure | HC in cm | Weight in kg | Height in cm | MUAC in cm | Temperature | Pulse rate | Breathing rate | Length of current illness in days | Parasitemia (%) | Other illness    | Other symptoms                   | Other symptoms (2) | Treatment received before coming to hospital | Date of recruitment |
|----------------|--------------|--------|--------------------|----------------|----------|--------------|--------------|------------|-------------|------------|----------------|-----------------------------------|-----------------|------------------|----------------------------------|--------------------|----------------------------------------------|---------------------|
| NGM-23         | 33           | M      | NA                 | NA             | 50       | 10           | NA           | 16         | 38.5        | 72         | 28             | 3                                 | 1.25            | URTI+ AWD        | Watery stool                     | C                  |                                              | 29/04/2011          |
| <b>NYM-33</b>  | 26           | M      | NA                 | 100/60         | 50       | 17           | 89           | 16         | 38.6        | 72         | 20             | 4                                 | 4.02            | Flu              |                                  | C                  | Antipyretics, cough medicine                 | 07/05/2011          |
| <b>NYM-40</b>  | 23           | F      | NA                 | 98/60          | 49       | 14           | 87           | 18         | 38.9        | 72         | 20             | 2                                 | 0.58            |                  | Nausea, loss of appetite         |                    | Antipyretics                                 | 12/05/2011          |
| <b>NYM-47</b>  | 13           | F      | NA                 | 97/55          | 46       | 12           | 71           | 14         | 38.9        | 72         | 20             | 3                                 | 0.37            | Skin lesions     | Shivering, vomiting              | C                  |                                              | 19/05/2011          |
| <b>NYM-55</b>  | 53           | M      | NA                 | NA             | 42       | 18           | 100          | NA         | 39          | 100        | 24             | 2                                 | 1.39            |                  |                                  | C                  |                                              | 09/03/2012          |
| <b>NYM-56</b>  | 60           | M      | NA                 | NA             | 54       | 19           | 117          | NA         | NA          | 98         | 22             | NA                                | 0.94            |                  | Vomiting                         | C, S               | Cotrimoxazole                                | 09/03/2012          |
| <b>NYM-61</b>  | 45           | M      | NA                 | 95/60          | 50.5     | 12           | 95           | NA         | NA          | 120        | 22             | 4                                 | 0.58            |                  |                                  | C                  |                                              | 18/04/2012          |
| <b>NYM-87</b>  | 60           | F      | NA                 | 85/50          | 53.5     | 22           | 130          | NA         | 39.54       | 130        | 36             | 3                                 | 1.9             |                  | Headache, anorexia               | C                  |                                              | 02/05/2012          |
| <b>NYM-108</b> | 48           | F      | NA                 | 90/60          | 49       | 15           | 98           | 14         | 37.08       | 98         | 28             | 1                                 | 1.14            |                  |                                  |                    |                                              | 16/05/2012          |
| <b>NYM-129</b> | 49           | M      | NA                 | 90/60          | 51       | 15           | 100          | 14         | 36.8        | 138        | 30             | 3                                 | 0.17            |                  | Abdominal pain, loss of appetite | C                  |                                              | 27/06/2012          |
| <b>NYM-142</b> | 51           | F      | YES                | 110/80         | 53       | 17           | 100          | 15         | 39.1        | 130        | 26             | 1                                 | 3.7             |                  | Headache                         |                    |                                              | 04/07/2012          |
| <b>NYM-147</b> | 48           | M      | YES                | 100/50         | 49       | 11           | 91           | 13.5       | 36.7        | 120        | 26             | 1                                 | 1.38            |                  |                                  | C                  |                                              | 06/07/2012          |
| <b>NYM-151</b> | 48           | F      | YES                | 110/80         | 48       | 15           | 96           | 17         | 36.3        | 95         | 20             | 2                                 | NA              |                  | Headache                         |                    |                                              | 07/07/2012          |
| <b>NYM-155</b> | 39           | M      | YES                | 100/70         | 51.5     | 15           | 95           | 17         | 37.1        | 100        | 26             | 1                                 | NA              |                  | Shivering, chills                | C                  |                                              | 09/07/2012          |
| <b>NYM-160</b> | 25           | F      | YES                | 85/60          | 48       | 10           | 80           | 14         | 37          | 104        | 24             | 2                                 | 0.89            |                  |                                  |                    |                                              | 11/07/2012          |
| <b>NYM-183</b> | 66           | M      | YES                | 90/55          | 52       | 18           | 109          | 15         | 37.5        | 118        | 20             | 1                                 | 2.34            | Intestinal worms | Abdominal pain, headache         | D, S               |                                              | 02/08/2012          |
| <b>NYM-196</b> | 48           | M      | YES                | 110/79         | 49       | 17           | 94           | 16         | 38.5        | 98         | 21             | 1                                 | NA              |                  |                                  | C                  |                                              | 05/12/2012          |
| <b>NYM-211</b> | 62           | F      | YES                | NA             | 50       | 14           | 104          | 15         | 36.59       | 100        | 22             | 3                                 | 1.32            | Tonsillitis      |                                  |                    |                                              | 09/12/2012          |
| <b>NYM-215</b> | 72           | F      | YES                | 115/80         | 50.5     | 20           | 106          | 17         | 38.3        | 106        | 28             | 1                                 | 1.17            |                  |                                  | C, D, Deh, M       |                                              | 17/12/2012          |
| <b>NYM-229</b> | 60           | F      | YES                | 120/70         | 5        | 18           | 113          | 16.5       | 39          | 170        | 60             | 2                                 | 1.3             |                  | Stomach ache                     |                    | Anti-bacterial                               | 05/03/2012          |

C – cough; D – diarrhea; Deh - signs of dehydration; HC - head circumference; M - dry mucus membrane; MUAC - mid-upper arm circumference; NA – not assessed; S - splenomegaly
