# Supplementary material for: The oxylipin and endocannabidome responses in acute phase Plasmodium falciparum malaria in children
Source: Springer Nature journal article supplement (doi:10.1186/s12936-017-2001-y), 2017-09-08
Supplement: MOESM3 [file 15032096]

## Additional file 3

### The oxylipin and endocannabinoidome responses in acute phase *Plasmodium falciparum* malaria in children

**Table.** Clinical information for the severe malaria patients included in the study. In bold marked samples analyzed for endocannabinoids content (see Methods section).

| Study code         | Age (months) | Gender | Vaccination status | Blood pressure | HC in cm | Weight in kg | Height in cm | MUAC in cm | Temperature | Pulse rate | Breathing rate | Blantyre coma scale | Length of current illness in days | Parasitemia (%) | Other illness          | Other symptoms             | Other symptoms (z)         | Treatment received before coming to hospital | Date of recruitment | Severe malaria subgroup (*) |
|--------------------|--------------|--------|--------------------|----------------|----------|--------------|--------------|------------|-------------|------------|----------------|---------------------|-----------------------------------|-----------------|------------------------|----------------------------|----------------------------|----------------------------------------------|---------------------|-----------------------------|
| <b>NYS-HYP-33</b>  | 51           | F      | NA                 | 90/60          | 45       | 12           | 100          | 14         | 40.09       | 162        | 52             | 5                   | 2                                 | 0.4             |                        | Abdominal pain, headache   | C, Deh, N, U, (s)          |                                              | 16/05/2012          | HYP                         |
| <b>NYA-SA-69</b>   | 27           | M      | YES                | 90/60          | 48       | 11           | 86           | 14         | 38          | 118        | 26             | 5                   | 3                                 | 6.58            |                        |                            | Deh, M, P, (s)             |                                              | 12/07/2012          | SA                          |
| <b>NYS-RD-87</b>   | 36           | F      | YES                |                | 47       | 13           | 87           | 16         | 39.97       | 120        | 29             | 5                   | 6                                 | 26.62           |                        | Prostration                | D, M, P, (s)               |                                              | 08/12/2012          | RD                          |
| <b>NYS-HYP-106</b> | 56           | F      | YES                | 100/74         | 50.5     | 13           | 44           | 14.2       | 36.69       | 102        | 26             | 5                   | 1                                 | 9.88            | Typhoid fever          |                            | Deh, P, (n)                |                                              | 13/12/2012          | HYP                         |
| <b>NYS-HYP-110</b> | 18           | F      | YES                |                | 46       | 14           |              | 17.5       | 36.18       | 116        | 30             | 5                   | 1                                 | 12.47           |                        |                            | C, Conv, D, M, N, P, (n)   |                                              | 17/12/2012          | HYP                         |
| <b>NYA-HYP-112</b> | 48           | M      | YES                | 108/78         | 52       | 18           | 104          | 16         | 38.4        | 96         | 24             | 5                   | 2                                 | 5.45            | Traditional uvulectomy | Abdominal discomfort       | P, (n)                     | Amoxycycline                                 | 18/12/2012          | HYP                         |
| <b>NYS-HYP-117</b> | 48           | M      | YES                |                | 50       | 18           | 103          | 16         | 39.8        | 110        | 30             | 5                   | 2                                 | 15.02           |                        | Restlessness, irritability | N, P (s)                   |                                              | 20/12/2012          | HYP                         |
| <b>NYS-FC-121</b>  | 29           | M      | YES                |                | 51       | 13           | 92           | 13.5       | 35.7        | 140        | 30             | 5                   | 2                                 | 17.53           |                        | Vomiting                   | B, Con, P, (n)             |                                              | 05/02/2013          | FC                          |
| <b>NYS-HG-125</b>  | 72           | F      | YES                | 120/50         | 50.5     | 15           | 107          | 14.5       | 39.4        | 190        | 60             | 5                   | 3                                 | 5.95            |                        | Abdominal pain             | B, C, Con, Conv(1), D, (s) | Ampicilin, paracetamol                       | 05/03/2013          | HG                          |
| <b>NYS-PR-133</b>  | 53           | M      | YES                | 110/76         | 51       | 12           | 96           | 16         | 38.2        | 122        | 26             | 5                   | 2                                 | 5.58            |                        | Vomiting                   | B, C, Conv(1), D, P, (n)   | Traditional herbs                            | 16/05/2013          | PR                          |
| <b>NYS-RD-138</b>  | 56           | M      | YES                | 106/92         | 50       | 15           | 101          | 17         | 37          | 156        | 36             | 5                   | 1                                 | 2.7             | Pneumonia              | Lethargy, abdominal pain   | B, C, Deh, H, M, P, (s)    |                                              | 20/05/2013          | RD                          |
| <b>NYS-FC-139</b>  | 24           | M      | YES                | 98/74          | 50       | 11           | 80           | 16         | 38.99       | 164        | 46             | 5                   | 1                                 | 10.6            | Intestinal parasites   | Vomiting                   | B, C, Con, D, H, P, (s)    |                                              | 20/05/2013          | FC                          |
| <b>NYS-CM-140</b>  | 55           | M      | YES                | 98/70          | 47       | 11           | 97           | 14         | 37.88       | 146        | 36             | 4                   | 2                                 | NA              |                        | Headache                   | B, C, Conv(3), W, (s)      |                                              | 20/05/2013          | CM                          |
| <b>NYS-HYP-141</b> | 62           | F      | NO                 | 106/92         | 51       | 17           | 115          | 16         |             | 138        | 24             | 5                   | 4                                 | 1.3             | Bronchitis             | Vomiting, shivers          | H, S, (n)                  |                                              | 22/05/2013          | HYP                         |
| <b>NYS-CM-150</b>  | 55           | F      | YES                | 118/98         | 50       | 15           | 106          | 15.5       | 38.5        | 164        | 34             | 5                   | 2                                 | 3.2             | Bronchitis             | Flue, abdominal pain       | C, P, (n)                  |                                              | 23/05/2013          | CM                          |
| <b>NYS-HYP-175</b> | 72           | M      | YES                | 118/94         | 50       | 22           | 113          | 17         | 39.3        | 160        | 44             | 5                   | 1                                 | 1.6             |                        | Headache, abdominal pain   | C                          |                                              | 13/07/2013          | HYP                         |
| <b>NYS-HYP-190</b> | 66           | M      | YES                | 110/90         | 52       | 19           | 111          | 16         | 37.3        | 116        | 40             | 5                   | 1                                 | 7.4             |                        | Headache, abdominal pain   | H, J, N, P, S, U, W, (s)   |                                              | 08/09/2013          | HYP                         |

|                   |    |   |     |        |    |    |     |    |       |     |    |   |   |      |  |                    |                      |                   |            |     |
|-------------------|----|---|-----|--------|----|----|-----|----|-------|-----|----|---|---|------|--|--------------------|----------------------|-------------------|------------|-----|
| <b>NYS-RD-206</b> | 64 | F | YES | 100/64 | 50 | 15 | 103 | 14 | 39.7  | 192 | 64 | 5 | 2 | 0.1  |  | Shivers, vomiting  | C, Deh, I, M, P, (s) | Traditional herbs | 18/9/2013  | RD  |
| <b>NYS-PR-217</b> | 64 | F | NO  | 100/68 | 51 | 17 | 103 | 17 | 38.4  | 144 | 28 | 4 | 1 | 1.4  |  | Headache, vomiting | H, P, S, (s)         |                   | 25/9/2013  | PR  |
| <b>NYS-HYP-92</b> | 46 | M | YES | 100/80 | 47 | 12 | 100 | 16 | 39.34 | 108 | 26 | 5 | 4 | 6.64 |  | Prostration        | Deh, M, P, S, (s)    |                   | 09/12/2012 | HYP |

B - breathlessness; C - cough; CM – cerebral malaria; Con - loss of conscious; Conv - convulsions (number); D - diarrhea; Deh - signs of dehydration; FC - febrile convulsions; H- hepatomegaly; HC - head circumference; HYP – hyperparasitemia; I - indrawing of intercostal spaces; J – jaundice; S - splenomegaly; M - dry mucus membrane; MUAC - mid-upper arm circumference, N - nasal flaring; NA – not assessed; P - is patient prostrated; PR – prostration; RD – respiratory distress; SA – severe anemia; U - black urine; W – wheezes; () – depth of breathing (n-normal, s-shallow);
