# Supplementary material for: The oxylipin and endocannabidome responses in acute phase Plasmodium falciparum malaria in children
Source: Springer Nature journal article supplement (doi:10.1186/s12936-017-2001-y), 2017-09-08
Supplement: MOESM5 [file 15032096]

## Additional file 5

### The oxylipin and endocannabinoidome responses in acute phase *Plasmodium falciparum* malaria in children

**Table.** Native standards and corresponding internal standards used in the study.

| Internal standard                         | Native standard                                                                                             |
|-------------------------------------------|-------------------------------------------------------------------------------------------------------------|
| <i>Endocannabinoid and related lipids</i> |                                                                                                             |
| 2-AG-d <sub>8</sub>                       | 2-AG; 2-LG                                                                                                  |
| AEA-d <sub>4</sub>                        | AEA                                                                                                         |
| OEA-d <sub>4</sub>                        | OEA, EPEA, NAGly, POEA, DHEA                                                                                |
| PEA-d <sub>4</sub>                        | PEA, DEA, LEA                                                                                               |
| SEA-d <sub>3</sub>                        | SEA                                                                                                         |
| PGF <sub>2α</sub> -EA-d <sub>4</sub>      | PGF <sub>2α</sub> -EA                                                                                       |
| PGE <sub>2</sub> -EA-d <sub>4</sub>       | PGE <sub>2</sub> -EA                                                                                        |
| <i>Oxylipins</i>                          |                                                                                                             |
| TXB <sub>2</sub> -d <sub>4</sub>          | TXB <sub>2</sub> , 9,12,13-TriHOME, 9,10,13-TriHOME,                                                        |
| 12,13-DIHOME-d <sub>4</sub>               | 12,13-DiHOME, 9,10-DiHOME, 14,15-DHET, 11,12-DHET, 8,9-DHET, 5,6-DHET                                       |
| 12(13)-EPOME-d <sub>4</sub>               | 12(13)-EPOME, 9(10)-EPOME                                                                                   |
| 9-HODE-d <sub>4</sub>                     | 13-HODE, 9-HODE, 17-HDoHE, 13-oxo-ODE, 15-oxo-ETE, 9-oxo-ODE, 15-HETrE, 12-oxo-ETE, 5-oxo-ETE               |
| 5-HETE-d <sub>8</sub>                     | 5-HETE, 12-HETE, 8-HETE, 9-HETE, 14(15)-EET, 11(12)-EET, 8(9)-EET, 5(6)-EET                                 |
| 20-HETE-d <sub>6</sub>                    | 12-HEPE, 20-HETE, 15-HETE, 11-HETE                                                                          |
| PGE <sub>2</sub> -d <sub>4</sub>          | PGF <sub>2α</sub> , PGE <sub>2</sub> , Resolvin D <sub>1</sub> , Resolvin D <sub>2</sub> , LTB <sub>4</sub> |
| PGD <sub>2</sub> -d <sub>4</sub>          | PGD <sub>2</sub>                                                                                            |
