# Supplementary material for: The oxylipin and endocannabidome responses in acute phase Plasmodium falciparum malaria in children
Source: Springer Nature journal article supplement (doi:10.1186/s12936-017-2001-y), 2017-09-08
Supplement: MOESM6 [file 15032096]

## Additional file 6

### The oxylipin and endocannabinoid responses in acute phase *Plasmodium falciparum* malaria in children

**Table.** Standard concentrations (ng/mL) used for calibration curves of endocannabinoids and related lipids. Stock solutions for all standards were weekly prepared and stored in methanol at -80 °C. Each native standard stock solution was diluted with methanol at ten different calibration levels (S1 – S10) and stored at -80 °C.

|            | Standard concentration (ng/mL) |                                              |             |        |                                                |
|------------|--------------------------------|----------------------------------------------|-------------|--------|------------------------------------------------|
|            | 2-AG, 2-LG                     | POEA, LEA, AEA,<br>DHEA, NAGly,<br>DEA, EPEA | OEA,<br>PEA | SEA    | PGF <sub>2α</sub> -EA,<br>PGE <sub>2</sub> -EA |
| <b>S1</b>  | 83.3                           | 4.17                                         | 2.08        | 6.94   | 0.67                                           |
| <b>S2</b>  | 41.6                           | 2.08                                         | 1.04        | 3.47   | 0.33                                           |
| <b>S3</b>  | 20.8                           | 1.04                                         | 0.52        | 1.74   | 0.17                                           |
| <b>S4</b>  | 10.4                           | 0.52                                         | 0.26        | 0.87   | 0.08                                           |
| <b>S5</b>  | 5.21                           | 0.26                                         | 0.13        | 0.43   | 0.04                                           |
| <b>S6</b>  | 2.60                           | 0.13                                         | 0.07        | 0.22   | 0.02                                           |
| <b>S7</b>  | 1.30                           | 0.07                                         | 0.03        | 0.11   | 0.01                                           |
| <b>S8</b>  | 0.26                           | 0.01                                         | 0.01        | 0.02   | 0.01                                           |
| <b>S9</b>  | 0.05                           | 0.003                                        | 0.0013      | 0.004  | 0.001                                          |
| <b>S10</b> | 0.01                           | 0.0003                                       | 0.0001      | 0.0004 | 0.0002                                         |
