# Supplementary material for: The oxylipin and endocannabidome responses in acute phase Plasmodium falciparum malaria in children
Source: Springer Nature journal article supplement (doi:10.1186/s12936-017-2001-y), 2017-09-08
Supplement: MOESM7 [file 15032096]

## Additional file 7

### The oxylin and endocannabidome responses in acute phase *Plasmodium falciparum* malaria in children

**Table.** Standard concentrations (pg/mL) used for calibration curves of oxylipins. Stock solutions for all standards were monthly prepared and stored in methanol at -80 °C. Each native standard stock solution was diluted with methanol at ten different calibration levels (S1 – S10) and stored at -80 °C.

| <b>Standard concentration (pg/mL)</b> |       |
|---------------------------------------|-------|
| <b>S1</b>                             | 16450 |
| <b>S2</b>                             | 8220  |
| <b>S3</b>                             | 4110  |
| <b>S4</b>                             | 2060  |
| <b>S5</b>                             | 1030  |
| <b>S6</b>                             | 514   |
| <b>S7</b>                             | 257   |
| <b>S8</b>                             | 129   |
| <b>S9</b>                             | 64    |
| <b>S10</b>                            | 37    |
