# Supplementary material for: The oxylipin and endocannabidome responses in acute phase Plasmodium falciparum malaria in children
Source: Springer Nature journal article supplement (doi:10.1186/s12936-017-2001-y), 2017-09-08
Supplement: MOESM8 [file 15032096]

## Additional file 8

### The oxylin and endocannabidome responses in acute phase *Plasmodium falciparum* malaria in children

**Table.** Parameters of models for oxylin discussed in the study.

| Parameter                    | PCA  | OPLS-DA<br>uncomplicated<br>versus controls | OPLS-DA<br>severe versus<br>controls | OPLS-DA<br>severe versus<br>uncomplicated |
|------------------------------|------|---------------------------------------------|--------------------------------------|-------------------------------------------|
| Number of<br>components      | 2    | 1+1+0                                       | 1+1+0                                | 1+1+0                                     |
| P1 (predictive<br>variation) | -    | 12.7%                                       | 16.1%                                | 9.9%                                      |
| R2X(cum)                     | 0.49 | 0.47                                        | 0.44                                 | 0.41                                      |
| R2(cum)                      | -    | 0.59                                        | 0.59                                 | 0.41                                      |
| Q2(cum)                      | 0.38 | 0.35                                        | 0.31                                 | 0.09                                      |
| CV-ANOVA                     | -    | $4.1 \times 10^{-3}$                        | $9.7 \times 10^{-3}$                 | 0.45                                      |
