# Supplementary material for: The oxylipin and endocannabidome responses in acute phase Plasmodium falciparum malaria in children
Source: Springer Nature journal article supplement (doi:10.1186/s12936-017-2001-y), 2017-09-08
Supplement: MOESM9 [file 15032096]

## Additional file 9

### The oxylipin and endocannabinoid responses in acute phase *Plasmodium falciparum* malaria in children

**Table.** Parameters of models for endocannabinoids discussed in the study.

| Parameter                    | PCA  | OPLS-DA<br>uncomplicated<br>versus controls | OPLS-DA<br>severe versus<br>controls | OPLS-DA<br>severe versus<br>uncomplicated |
|------------------------------|------|---------------------------------------------|--------------------------------------|-------------------------------------------|
| Number of<br>components      | 2    | 1+1+0                                       | 1+1+0                                | No model                                  |
| P1 (predictive<br>variation) | -    | 33.8%                                       | 36.1%                                |                                           |
| R2X(cum)                     | 0.59 | 0.57                                        | 0.53                                 |                                           |
| R2(cum)                      | -    | 0.69                                        | 0.82                                 |                                           |
| Q2(cum)                      | 0.23 | 0.53                                        | 0.59                                 |                                           |
| CV-ANOVA                     | -    | $4.3 \times 10^{-3}$                        | $4.6 \times 10^{-3}$                 |                                           |
