# Supplementary material for: The oxylipin and endocannabidome responses in acute phase Plasmodium falciparum malaria in children
Source: Springer Nature journal article supplement (doi:10.1186/s12936-017-2001-y), 2017-09-08
Supplement: MOESM10 [file 15032096]

## Additional file 10

### The oxylipin and endocannabinoidome responses in acute phase *Plasmodium falciparum* malaria in children

**Table.** Oxylipin levels (pM) in the blood serum samples from controls, uncomplicated malaria and severe malaria patients. Shown are medians interquartile range (IQR) and total ranges for the lipids.

| Compound                | Controls (n=20) |        |              | Uncomplicated malaria (n=20) |        |              | Severe malaria (n=21) |        |              |
|-------------------------|-----------------|--------|--------------|------------------------------|--------|--------------|-----------------------|--------|--------------|
|                         | Median          | IQR    | Range        | Median                       | IQR    | Range        | Median                | IQR    | Range        |
| 6-ketoPGF <sub>1α</sub> | 0               | 0      | 0-5791       | 0                            | 0      | 0-329        | 0                     | 0      | 0-215        |
| TXB <sub>2</sub>        | 1838            | 17492  | 0-81519      | 73                           | 522    | 0-2715       | 345                   | 1184   | 6-10366      |
| 9,12,13-TriHOME         | 2173            | 1707   | 712-22106    | 3142                         | 8136   | 942-22141    | 7627                  | 8962   | 1462-22704   |
| 9,10,13-TriHOME         | 711             | 651    | 295-7596     | 879                          | 777    | 380-6666     | 1260                  | 2040   | 489-5450     |
| PGF <sub>2α</sub>       | 264             | 1114   | 0-3754       | 291                          | 219    | 0-435        | 159                   | 158    | 0-418        |
| PGE <sub>2</sub>        | 188             | 1163   | 12-13266     | 117                          | 540    | 0-2728       | 118                   | 206    | 7-723        |
| PGD <sub>2</sub>        | 113             | 1366   | 0-18123      | 99                           | 538    | 0-2078       | 85                    | 106    | 0-602        |
| Resolvin D2             | 151             | 288    | 0-7461       | 327                          | 437    | 0-1331       | 192                   | 171    | 0-1942       |
| Resolvin D1             | 0               | 6      | 0-477        | 0                            | 0      | 0-15         | 0                     | 7      | 0-12         |
| 5(S)6(R)-LXA4           | 74              | 678    | 0-7219       | 53                           | 326    | 0-690        | 49                    | 78     | 0-1044       |
| 5(S)6(S)-LXA4           | 0               | 0      | 0-109        | 0                            | 0      | 0-594        | 0                     | 0      | 0-1285       |
| trans-LTB4              | 26              | 289    | 0-18988      | 10                           | 126    | 0-358        | 50                    | 109    | 0-182        |
| LTB4                    | 0               | 8      | 0-64         | 0                            | 0      | 0-42         | 24                    | 49     | 0-286        |
| 12,13-DiHOME            | 58497           | 68737  | 15696-551254 | 69418                        | 151905 | 12986-665258 | 94261                 | 49076  | 16246-458524 |
| 9,10-DiHOME             | 83027           | 136497 | 15666-512201 | 79811                        | 146439 | 11226-271801 | 102191                | 180587 | 12055-334198 |
| 14,15-DHET              | 9538            | 10696  | 4281-34604   | 13652                        | 13312  | 528-124994   | 13544                 | 10597  | 6909-37139   |
| 11,12-DHET              | 6778            | 9919   | 2895-27982   | 9165                         | 11282  | 3373-74461   | 8681                  | 9844   | 3142-24196   |
| 8,9-DHET                | 7218            | 11553  | 812-21858    | 8337                         | 12639  | 2003-50746   | 6992                  | 6629   | 2662-19355   |
| 5,6-DHET                | 7067            | 7881   | 1392-34250   | 2531                         | 4031   | 1090-15495   | 3841                  | 2849   | 0-10180      |
| 12-HEPE                 | 1345            | 4282   | 55-45642     | 741                          | 3669   | 105-11338    | 602                   | 753    | 43-2704      |
| 20-HETE                 | 1261            | 1336   | 0-2794       | 2664                         | 2322   | 907-4623     | 2268                  | 2459   | 230-6780     |
| 13-HODE                 | 32442           | 48737  | 6641-554754  | 46196                        | 51382  | 6126-105804  | 59477                 | 107680 | 11188-334527 |
| 9-HODE                  | 19804           | 28629  | 3143-635378  | 25931                        | 33296  | 3688-71593   | 39696                 | 53556  | 6273-185003  |
| 15-HETE                 | 1944            | 7820   | 372-40927    | 1485                         | 1569   | 289-12567    | 1496                  | 1381   | 599-4118     |
| 13-oxo-ODE              | 7582            | 7756   | 0-45567      | 7714                         | 7952   | 996-24260    | 13722                 | 22511  | 1174-152879  |
| 11-HETE                 | 550             | 3643   | 110-14436    | 337                          | 897    | 40-4009      | 527                   | 382    | 125-1574     |
| 15-oxo-EETE             | 231             | 829    | 67-6007      | 264                          | 441    | 99-4559      | 358                   | 814    | 111-4033     |
| 12-HETE                 | 3577            | 20285  | 204-346882   | 298                          | 8120   | 298-16044    | 1582                  | 1787   | 359-6637     |
| 8-HETE                  | 355             | 1377   | 57-6670      | 377                          | 702    | 84-1651      | 430                   | 315    | 165-1050     |
| 15-HETrE                | 333             | 2266   | 0-21027      | 250                          | 387    | 0-2091       | 359                   | 309    | 0-1377       |
| 12-oxo-EETE             | 611             | 6757   | 0-14017      | 1351                         | 8060   | 0-16421      | 0                     | 7980   | 0-13770      |
| 9-HETE                  | 1209            | 13415  | 346-89276    | 1639                         | 3565   | 271-14450    | 2052                  | 2626   | 226-9485     |
| 5-HETE                  | 1562            | 4189   | 173-52632    | 935                          | 1698   | 171-4290     | 1325                  | 1297   | 221-4193     |
| 12(13)-EpOME            | 503             | 810    | 123-9425     | 1584                         | 1524   | 278-11671    | 1769                  | 3949   | 418-13525    |
| 14(15)-EET              | 71              | 270    | 0-2428       | 172                          | 515    | 0-1803       | 424                   | 631    | 0-1249       |
| 9(10)-EpOME             | 3870            | 9045   | 969-80309    | 12510                        | 20731  | 1615-117389  | 15614                 | 29136  | 2392-234289  |
| 11(12)-EET              | 137             | 526    | 0-1508       | 187                          | 327    | 0-1299       | 231                   | 339    | 54-927       |

|                             |     |     |        |     |     |         |     |     |          |
|-----------------------------|-----|-----|--------|-----|-----|---------|-----|-----|----------|
| <b>5-oxo-E<sub>2</sub>T</b> | 273 | 634 | 0-2512 | 231 | 388 | 0-1371  | 396 | 693 | 0-5132   |
| <b>8(9)-E<sub>2</sub>T</b>  | 109 | 286 | 0-974  | 180 | 326 | 0-1056  | 250 | 376 | 0-1247   |
| <b>5(6)-E<sub>2</sub>T</b>  | 212 | 300 | 0-3225 | 393 | 802 | 50-3431 | 690 | 916 | 106-2213 |
