# Supplementary material for: The oxylipin and endocannabidome responses in acute phase Plasmodium falciparum malaria in children
Source: Springer Nature journal article supplement (doi:10.1186/s12936-017-2001-y), 2017-09-08
Supplement: MOESM11 [file 15032096]

## Additional file 11

### The oxylipin and endocannabinoidome responses in acute phase *Plasmodium falciparum* malaria in children

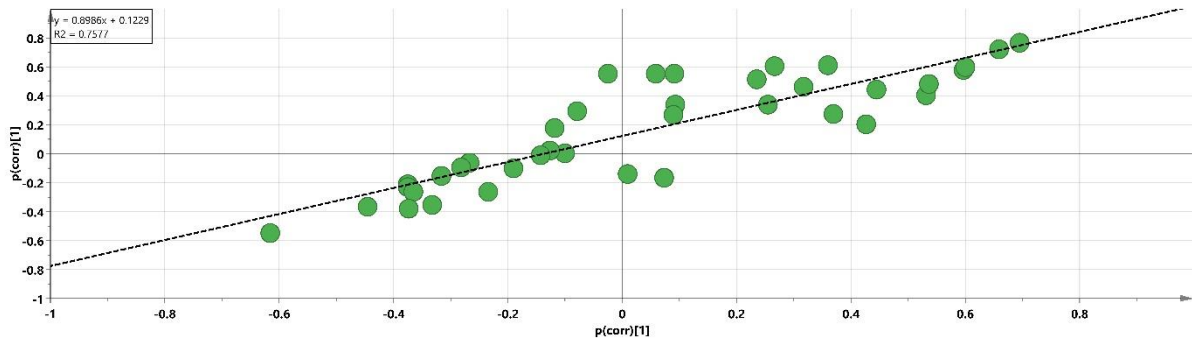

**Figure.** OPLS-DA correlation loadings (p(corr)) from the uncomplicated versus controls (X axis) and severe versus controls (Y axis) models; with dots symbolizing oxylipin species.
