# Supplementary material for: The oxylipin and endocannabidome responses in acute phase Plasmodium falciparum malaria in children
Source: Springer Nature journal article supplement (doi:10.1186/s12936-017-2001-y), 2017-09-08
Supplement: MOESM12 [file 15032096]

## Additional file 12

### The oxylipin and endocannabinoidome responses in acute phase *Plasmodium falciparum* malaria in children

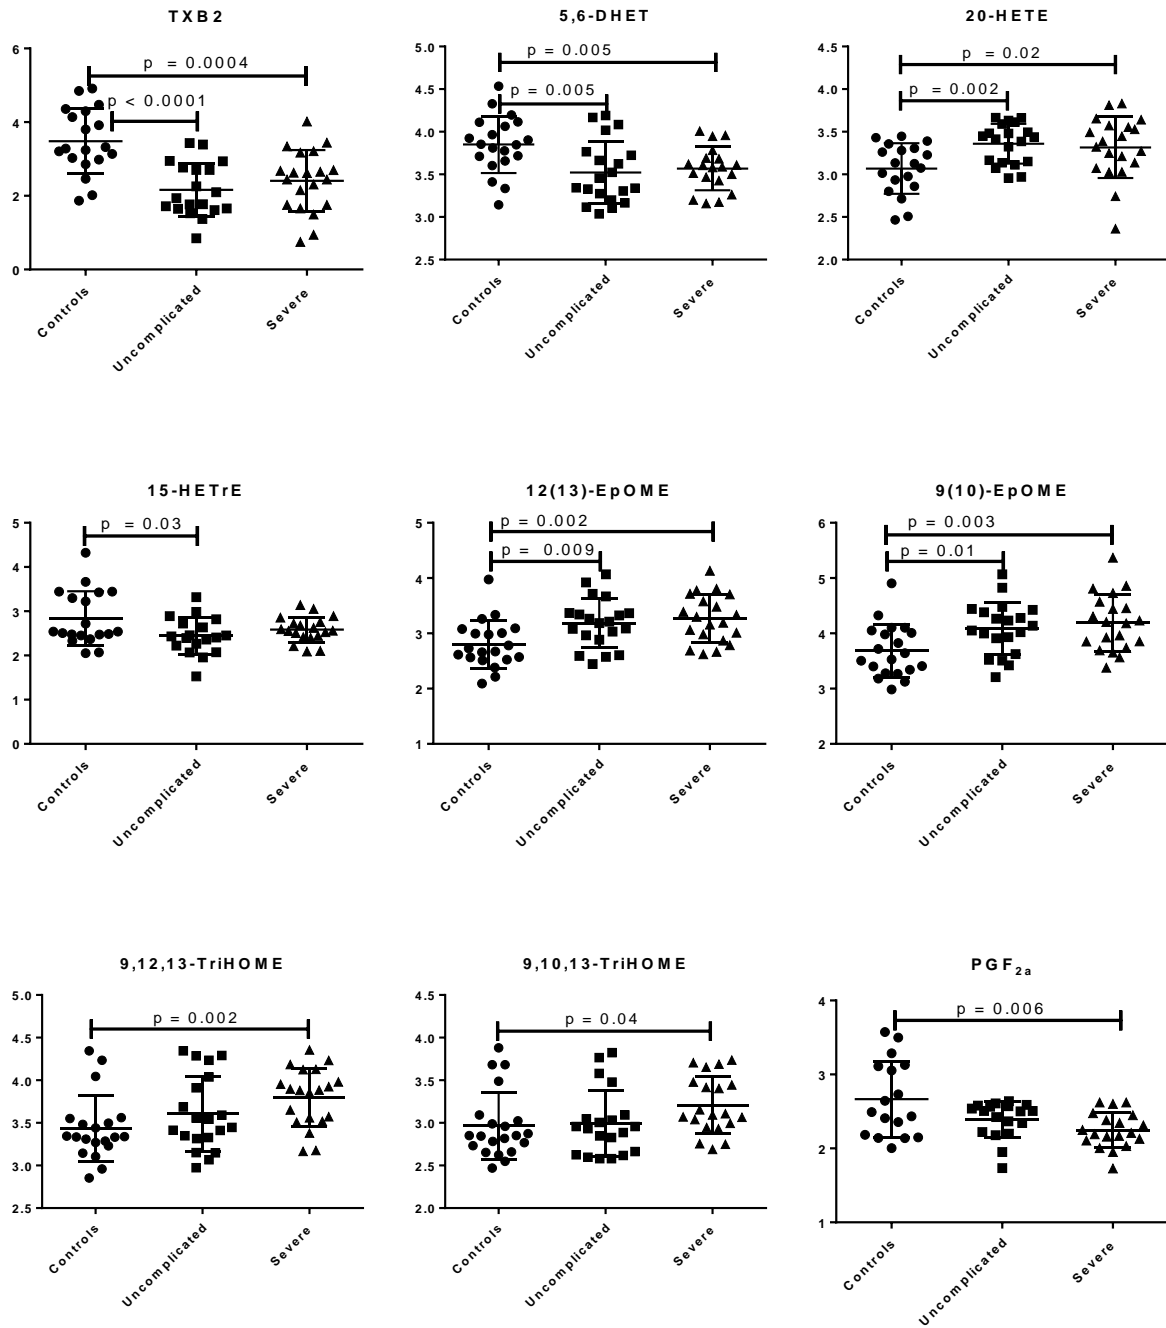

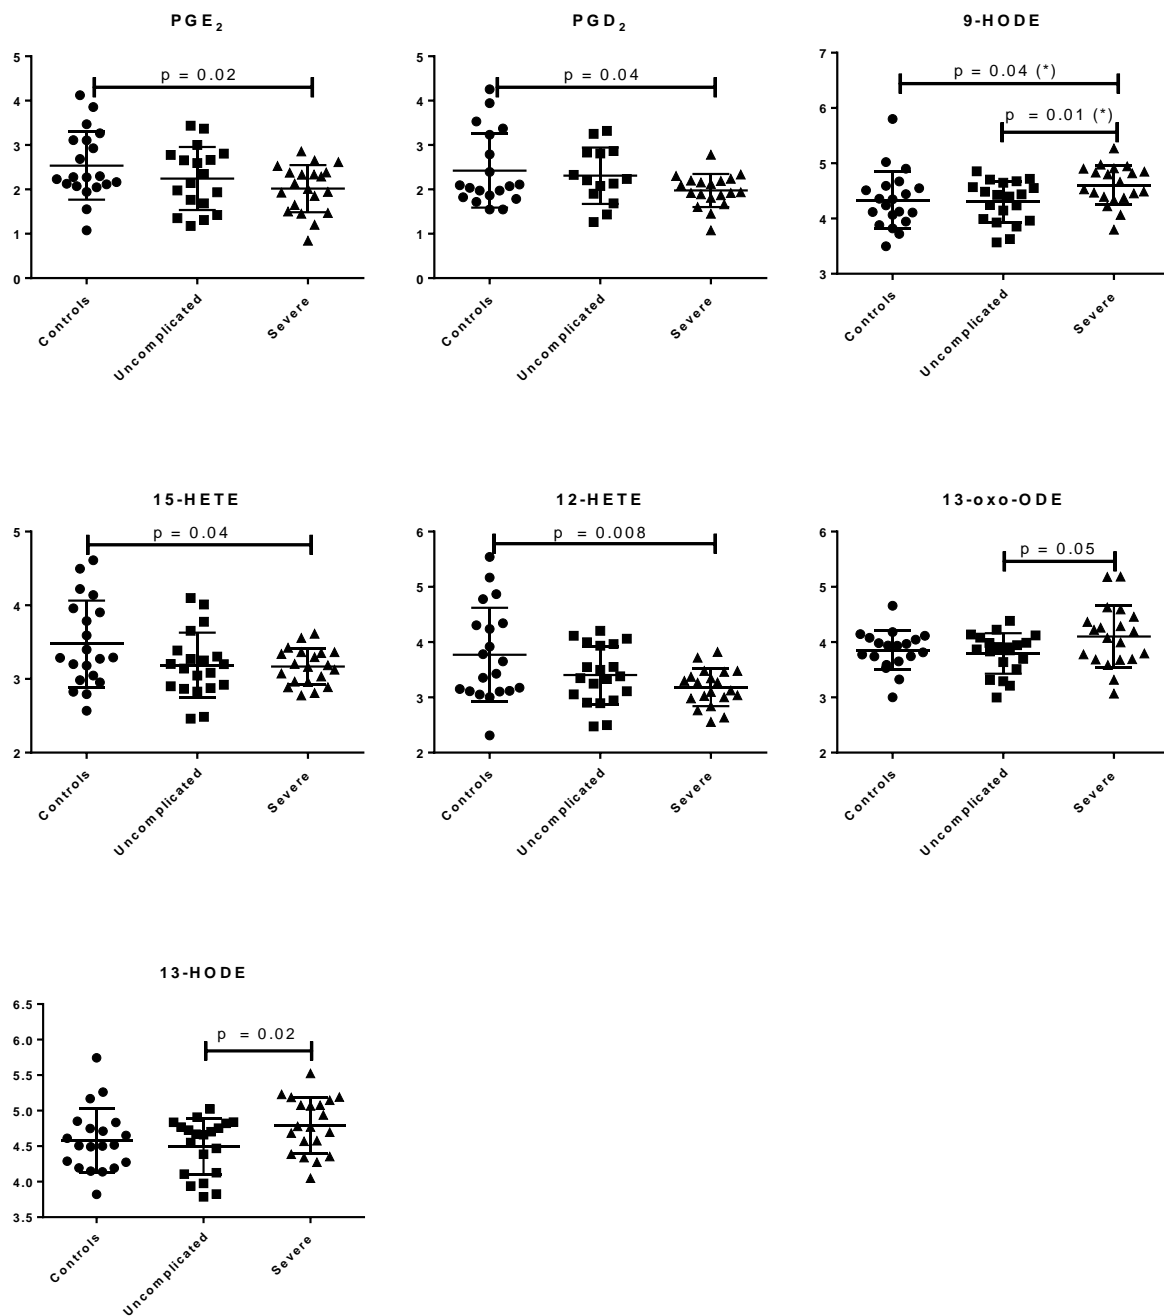

**Figure.** Scatter plots for oxylipins that showed significant p-values (t-test analysis with Welch's correction) in between group comparisons (based on the log transformed data); (\*) – Mann-Whitney test.
