# Supplementary material for: The oxylipin and endocannabidome responses in acute phase Plasmodium falciparum malaria in children
Source: Springer Nature journal article supplement (doi:10.1186/s12936-017-2001-y), 2017-09-08
Supplement: MOESM13 [file 15032096]

## Additional file 13

### The oxylipin and endocannabinoidome responses in acute phase *Plasmodium falciparum* malaria in children

**Table.** Correlation of oxylipin levels with temperature; r – Pearson correlation coefficient, p – two-tailed p value; ns – p value above 0.05.

| Compound                  | Controls |       | Infected individuals |       |
|---------------------------|----------|-------|----------------------|-------|
|                           | r        | p     | r                    | p     |
| TXB <sub>2</sub>          | 0.257    | ns    | -0.203               | ns    |
| 9,12,13-TriHOME           | 0.665    | 0.001 | 0.122                | ns    |
| 9,10,13-TriHOME           | 0.628    | 0.003 | 0.254                | ns    |
| PGF <sub>2α</sub>         | 0.634    | 0.003 | -0.133               | ns    |
| PGE <sub>2</sub>          | 0.555    | 0.011 | -0.290               | ns    |
| PGD <sub>2</sub>          | 0.606    | 0.005 | -0.291               | ns    |
| Resolvin D2               | 0.553    | 0.012 | -0.344               | 0.037 |
| Resolvin D1               | 0.425    | ns    | -0.307               | ns    |
| 5(S)6(R)-LXA <sub>4</sub> | 0.654    | 0.002 | -0.179               | ns    |
| trans-LTB <sub>4</sub>    | 0.597    | 0.006 | -0.213               | ns    |
| LTB <sub>4</sub>          | -0.103   | ns    | 0.225                | ns    |
| 12,13-DiHOME              | 0.604    | 0.005 | -0.154               | ns    |
| 9,10-DiHOME               | 0.334    | ns    | -0.162               | ns    |
| 14,15-DHET                | 0.009    | ns    | -0.192               | ns    |
| 11,12-DHET                | 0.001    | ns    | -0.222               | ns    |
| 8,9-DHET                  | 0.368    | ns    | -0.254               | ns    |
| 5,6-DHET                  | 0.561    | 0.010 | -0.268               | ns    |
| 12-HEPE                   | 0.025    | ns    | -0.203               | ns    |
| 20-HETE                   | -0.078   | ns    | 0.114                | ns    |
| 13-HODE                   | 0.572    | 0.008 | 0.109                | ns    |
| 9-HODE                    | 0.504    | 0.023 | 0.079                | ns    |
| 15-HETE                   | 0.616    | 0.004 | -0.205               | ns    |
| 13-oxo-ODE                | 0.454    | 0.044 | 0.033                | ns    |
| 11-HETE                   | 0.560    | 0.010 | -0.233               | ns    |
| 15-oxo-EETE               | 0.526    | 0.017 | -0.183               | ns    |
| 12-HETE                   | 0.229    | ns    | -0.185               | ns    |
| 8-HETE                    | 0.677    | 0.001 | -0.177               | ns    |
| 15-HETrE                  | 0.521    | 0.019 | -0.163               | ns    |
| 12-oxo-EETE               | 0.366    | ns    | 0.096                | ns    |
| 9-HETE                    | 0.654    | 0.002 | -0.234               | ns    |
| 5-HETE                    | 0.640    | 0.002 | -0.113               | ns    |
| 12(13)-EpOME              | -0.252   | ns    | 0.295                | ns    |
| 14(15)-EET                | -0.199   | ns    | 0.275                | ns    |
| 9(10)-EpOME               | -0.229   | ns    | 0.267                | ns    |
| 11(12)-EET                | -0.127   | ns    | 0.195                | ns    |
| 5-oxo-EETE                | 0.588    | 0.006 | 0.162                | ns    |
| 8(9)-EET                  | -0.193   | ns    | 0.175                | ns    |
| 5(6)-EET                  | -0.251   | ns    | 0.108                | ns    |
