# Supplementary material for: The oxylipin and endocannabidome responses in acute phase Plasmodium falciparum malaria in children
Source: Springer Nature journal article supplement (doi:10.1186/s12936-017-2001-y), 2017-09-08
Supplement: MOESM14 [file 15032096]

|                    |        |         |                  |                 |        |        |         |                  |                 |        |        |         |                  |         |
|--------------------|--------|---------|------------------|-----------------|--------|--------|---------|------------------|-----------------|--------|--------|---------|------------------|---------|
| 5(S)6(R)-LXA4      | 0.5813 | 0.5813  | 0.3994 to 0.7631 | 0.3794          |        | 0.5917 | 0.08975 | 0.4157 to 0.7676 | 0.3154          |        | 0.5083 | 0.09382 | 0.3244 to 0.6923 | 0.9273  |
| <i>trans</i> -LTB4 | 0.5475 | 0.09279 | 0.3656 to 0.7294 | 0.6073          |        | 0.5548 | 0.09473 | 0.3691 to 0.7405 | 0.5486          |        | 0.5905 | 0.09443 | 0.4053 to 0.7756 | 0.3217  |
| 12,13-DiHOME       | 0.5425 | 0.09297 | 0.3602 to 0.7248 | 0.6456          |        | 0.6095 | 0.09141 | 0.4303 to 0.7887 | 0.2303          |        | 0.5405 | 0.09346 | 0.3572 to 0.7237 | 0.6575  |
| 9,10-DiHOME        | 0.5625 | 0.09231 | 0.3815 to 0.7435 | 0.4989          |        | 0.531  | 0.09182 | 0.3509 to 0.7110 | 0.7346          |        | 0.5881 | 0.08991 | 0.4118 to 0.7644 | 0.3346  |
| 14,15-DHET         | 0.6675 | 0.08644 | 0.4980 to 0.8370 | 0.06999         |        | 0.6571 | 0.08756 | 0.4855 to 0.8288 | 0.08524         |        | 0.5167 | 0.09236 | 0.3356 to 0.6977 | 0.8551  |
| 11,12-DHET         | 0.625  | 0.08988 | 0.4488 to 0.8012 | 0.1763          |        | 0.5476 | 0.09282 | 0.3657 to 0.7296 | 0.6019          |        | 0.5952 | 0.08919 | 0.4204 to 0.7701 | 0.2969  |
| 8,9-DHET           | 0.5625 | 0.09212 | 0.3819 to 0.7431 | 0.4989          |        | 0.5    | 0.09382 | 0.3161 to 0.6839 | 1               |        | 0.5643 | 0.09225 | 0.3834 to 0.7451 | 0.4813  |
| 5,6-DHET           | 0.7475 | 0.07991 | 0.5908 to 0.9042 | <b>0.007431</b> | < 5891 | 0.7786 | 0.07518 | 0.6312 to 0.9260 | <b>0.002288</b> | < 5028 | 0.5143 | 0.09411 | 0.3298 to 0.6988 | 0.8757  |
| 12-HEPE            | 0.59   | 0.09112 | 0.4114 to 0.7686 | 0.3302          |        | 0.6881 | 0.08609 | 0.5193 to 0.8569 | <b>0.0394</b>   | < 1475 | 0.5762 | 0.09415 | 0.3916 to 0.7608 | 0.404   |
| 20-HETE            | 0.7975 | 0.06909 | 0.6621 to 0.9329 | <b>0.001295</b> | > 2803 | 0.706  | 0.08255 | 0.5441 to 0.8678 | <b>0.02411</b>  | > 2797 | 0.5381 | 0.09181 | 0.3581 to 0.7181 | 0.6765  |
| 13-HODE            | 0.515  | 0.09505 | 0.3287 to 0.7013 | 0.8711          |        | 0.6286 | 0.08914 | 0.4538 to 0.8033 | 0.1591          |        | 0.6619 | 0.08601 | 0.4933 to 0.8305 | 0.07619 |
| 9-HODE             | 0.525  | 0.0932  | 0.3423 to 0.7077 | 0.7868          |        | 0.6643 | 0.08738 | 0.4930 to 0.8356 | 0.07197         |        | 0.6762 | 0.08458 | 0.5104 to 0.8420 | 0.05365 |

|              |        |         |                        |                |        |        |         |                     |                |         |        |         |                     |         |
|--------------|--------|---------|------------------------|----------------|--------|--------|---------|---------------------|----------------|---------|--------|---------|---------------------|---------|
| 15-HETE      | 0.6425 | 0.08832 | 0.4693<br>to<br>0.8157 | 0.1232         |        | 0.65   | 0.08824 | 0.4770 to<br>0.8230 | 0.1004         |         | 0.5119 | 0.09266 | 0.3302 to<br>0.6936 | 0.8962  |
| 13-oxo-ODE   | 0.5025 | 0.09308 | 0.3200<br>to<br>0.6850 | 0.9784         |        | 0.6333 | 0.08989 | 0.4571 to<br>0.8096 | 0.1442         |         | 0.631  | 0.09019 | 0.4541 to<br>0.8078 | 0.1515  |
| 11-HETE      | 0.6425 | 0.08872 | 0.4686<br>to<br>0.8164 | 0.1232         |        | 0.5905 | 0.09381 | 0.4066 to<br>0.7744 | 0.3217         |         | 0.55   | 0.09521 | 0.3634 to<br>0.7366 | 0.5839  |
| 15-oxo-ETE   | 0.525  | 0.0932  | 0.3423<br>to<br>0.7077 | 0.7868         |        | 0.5405 | 0.09241 | 0.3593 to<br>0.7216 | 0.6575         |         | 0.5714 | 0.09057 | 0.3939 to<br>0.7490 | 0.434   |
| 12-HETE      | 0.615  | 0.09092 | 0.4368<br>to<br>0.7932 | 0.2134         |        | 0.731  | 0.07946 | 0.5752 to<br>0.8867 | <b>0.01144</b> | < 3737  | 0.6548 | 0.08788 | 0.4825 to<br>0.8270 | 0.09007 |
| 8-HETE       | 0.5125 | 0.09471 | 0.3268<br>to<br>0.6982 | 0.8924         |        | 0.5071 | 0.09877 | 0.3135 to<br>0.7008 | 0.9376         |         | 0.5119 | 0.09503 | 0.3256 to<br>0.6982 | 0.8962  |
| 15-HETrE     | 0.6925 | 0.08465 | 0.5266<br>to<br>0.8584 | <b>0.03731</b> | < 1523 | 0.5667 | 0.09363 | 0.3831 to<br>0.7502 | 0.4652         |         | 0.6095 | 0.09093 | 0.4313 to<br>0.7878 | 0.2303  |
| 12-oxo-ETE   | 0.595  | 0.09108 | 0.4164<br>to<br>0.7736 | 0.304          |        | 0.5262 | 0.0916  | 0.3466 to<br>0.7058 | 0.7742         |         | 0.6214 | 0.08986 | 0.4453 to<br>0.7976 | 0.1835  |
| 9-HETE       | 0.595  | 0.09314 | 0.4124<br>to<br>0.7776 | 0.304          |        | 0.5548 | 0.09534 | 0.3678 to<br>0.7417 | 0.5486         |         | 0.5095 | 0.09306 | 0.3271 to<br>0.6920 | 0.9169  |
| 5-HETE       | 0.6475 | 0.08833 | 0.4743<br>to<br>0.8207 | 0.1106         |        | 0.631  | 0.08799 | 0.4584 to<br>0.8035 | 0.1515         |         | 0.5262 | 0.09343 | 0.3430 to<br>0.7093 | 0.7742  |
| 12(13)-EpOME | 0.7475 | 0.07878 | 0.5930<br>to<br>0.9020 | 0.007431       |        | 0.7571 | 0.07665 | 0.6069 to<br>0.9074 | 0.004869       |         | 0.5286 | 0.09192 | 0.3484 to<br>0.7088 | 0.7543  |
| 14,15-EET    | 0.6475 | 0.08991 | 0.4712<br>to<br>0.8238 | 0.1106         |        | 0.6976 | 0.087   | 0.5271 to<br>0.8682 | <b>0.03045</b> | > 97.00 | 0.5167 | 0.09222 | 0.3359 to<br>0.6975 | 0.8551  |

|             |        |         |                        |          |  |        |         |                     |                |         |        |         |                     |        |
|-------------|--------|---------|------------------------|----------|--|--------|---------|---------------------|----------------|---------|--------|---------|---------------------|--------|
| 9(10)-EpOME | 0.74   | 0.07894 | 0.5853<br>to<br>0.8947 | 0.009437 |  | 0.7333 | 0.0801  | 0.5763 to<br>0.8904 | <b>0.01062</b> | > 13906 | 0.5667 | 0.09128 | 0.3877 to<br>0.7456 | 0.4652 |
| 11,12-EET   | 0.5425 | 0.0929  | 0.3604<br>to<br>0.7246 | 0.6456   |  | 0.5905 | 0.09276 | 0.4086 to<br>0.7723 | 0.3217         |         | 0.569  | 0.09256 | 0.3876 to<br>0.7505 | 0.4495 |
| 8,9-EET     | 0.6    | 0.09092 | 0.4217<br>to<br>0.7783 | 0.2793   |  | 0.644  | 0.08924 | 0.4691 to<br>0.8190 | 0.1146         |         | 0.556  | 0.09146 | 0.3767 to<br>0.7352 | 0.54   |
| 5,6-EET     | 0.64   | 0.08851 | 0.4665<br>to<br>0.8135 | 0.1299   |  | 0.6821 | 0.08797 | 0.5097 to<br>0.8546 | 0.04607        |         | 0.5571 | 0.09335 | 0.3741 to<br>0.7402 | 0.5314 |
