# Supplementary material for: The oxylipin and endocannabidome responses in acute phase Plasmodium falciparum malaria in children
Source: Springer Nature journal article supplement (doi:10.1186/s12936-017-2001-y), 2017-09-08
Supplement: MOESM15 [file 15032096]

## Additional file 15

### The oxylipin and endocannabinoidome responses in acute phase *Plasmodium falciparum* malaria in children

**Table.** Endocannabinoids levels (pM) in the blood serum samples from controls, uncomplicated malaria and severe malaria patients. Shown are medians interquartile range (IQR) and total ranges for the lipids.

| Compound                   | Controls (n=20) |       |             | Uncomplicated malaria (n=20) |       |           | Severe malaria (n=21) |       |           |
|----------------------------|-----------------|-------|-------------|------------------------------|-------|-----------|-----------------------|-------|-----------|
|                            | Median          | IQR   | Range       | Median                       | IQR   | Range     | Median                | IQR   | Range     |
| <b>2AG</b>                 | 13              | 39    | 6-51        | 48                           | 48    | 9-82      | 49                    | 84    | 16-235    |
| <b>AEA</b>                 | 1.7             | 2.4   | 0.1-4.8     | 1.6                          | 4.5   | 0.5-13.4  | 2.9                   | 11.6  | 0.3-31.4  |
| <b>OEA</b>                 | 2.3             | 1.6   | 1.1-4.4     | 7.6                          | 5.0   | 3.5-18.0  | 10.1                  | 8.9   | 4.1-18.9  |
| <b>PEA</b>                 | 3.4             | 4.8   | 1.0-8.1     | 9.2                          | 8.4   | 5.2-19.7  | 13.0                  | 10.6  | 7.8-21.8  |
| <b>DEA</b>                 | 0.2             | 0.2   | 0.1-0.6     | 0.5                          | 0.4   | 0.2-1.0   | 0.7                   | 0.5   | 0.3-1.1   |
| <b>NAGLy</b>               | 11.0            | 6.8   | 2.9-29.8    | 6.2                          | 4.9   | 2.1-20.2  | 5.1                   | 9.3   | 2.3-58.3  |
| <b>EPEA</b>                | 0.05            | 0.04  | 0.02-0.09   | 0.12                         | 0.07  | 0.01-0.26 | 0.14                  | 0.14  | 0.07-0.57 |
| <b>DHEA</b>                | 0.3             | 0.5   | 0.2-1.2     | 0.8                          | 1.8   | 0.3-3.0   | 1.4                   | 1.7   | 0.3-3.5   |
| <b>POEA</b>                | 0               | 0.3   | 0-0.4       | 0.2                          | 0.5   | 0.1-1.6   | 0.4                   | 0.6   | 0.0-2.1   |
| <b>LEA</b>                 | 1.7             | 2.7   | 0.2-4.6     | 2.1                          | 2.8   | 0.7-8.1   | 2.3                   | 2.3   | 0.9-5.1   |
| <b>PGF<sub>2α</sub>-EA</b> | 0.006           | 0.003 | 0.003-0.009 | 0.005                        | 0.007 | 0-0.009   | 0.005                 | 0.004 | 0.0-0.14  |
| <b>PGE<sub>2</sub>-EA</b>  | 0.004           | 0.006 | 0.0-0.028   | 0.006                        | 0.007 | 0-0.029   | 0.006                 | 0.031 | 0.0-0.049 |
