# Supplementary material for: The oxylipin and endocannabidome responses in acute phase Plasmodium falciparum malaria in children
Source: Springer Nature journal article supplement (doi:10.1186/s12936-017-2001-y), 2017-09-08
Supplement: MOESM18 [file 15032096]

## Additional file 18

### The oxylipin and endocannabinoidome responses in acute phase *Plasmodium falciparum* malaria in children

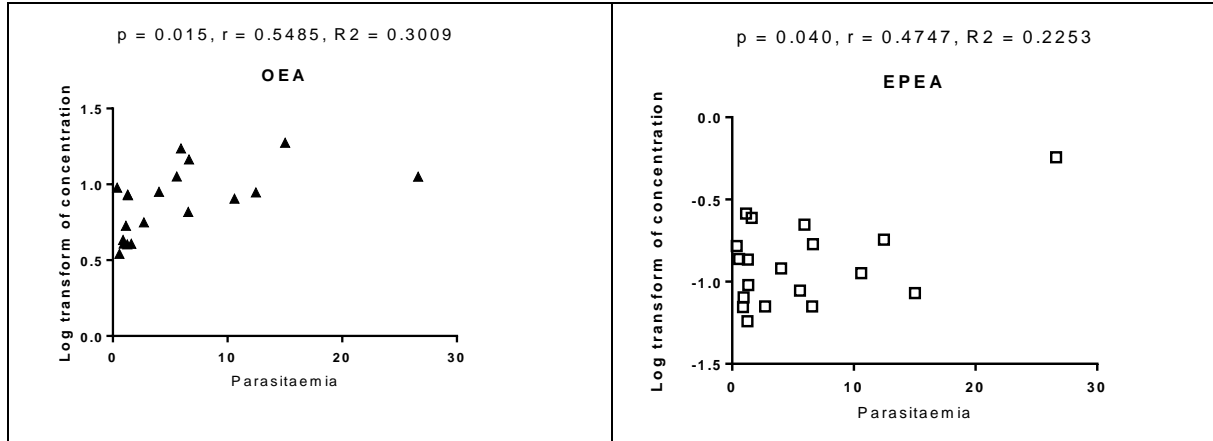

**Figure.** Correlation of OEA (left) and EPEA (right) with parasitaemia values.
