# Supplementary material for: The oxylipin and endocannabidome responses in acute phase Plasmodium falciparum malaria in children
Source: Springer Nature journal article supplement (doi:10.1186/s12936-017-2001-y), 2017-09-08
Supplement: MOESM19 [file 15032096]

## Additional file 19

### The oxylinin and endocannabinoids responses in acute phase *Plasmodium falciparum* malaria in children

**Table.** ROC curves results for endocannabinoids: area under the curve (AUC), standard error (std error), p value and Youden score (pM), in bold significant metabolites.

| Compound     | Controls vs Uncomplicated |              |                       |               |                    | Controls vs severe |              |                      |              |                    | Uncomplicated vs Severe |           |                  |         |
|--------------|---------------------------|--------------|-----------------------|---------------|--------------------|--------------------|--------------|----------------------|--------------|--------------------|-------------------------|-----------|------------------|---------|
|              | AUC                       | Std error    | 95% CI                | P value       | Youden Score (nM)  | AUC                | Std error    | 95% CI               | P value      | Youden Score       | AUC                     | Std error | 95% CI           | P value |
| <b>2AG</b>   | <b>0.95</b>               | <b>0.050</b> | <b>0.855 - 1.05</b>   | <b>0.001</b>  | <b>&gt; 19.98</b>  | <b>0.988</b>       | <b>0.020</b> | <b>0.948 -1.027</b>  | <b>0.001</b> | <b>&gt; 21.42</b>  | 0.5315                  | 0.1241    | 0.2881 to 0.7748 | 0.7943  |
| <b>AEA</b>   | 0.55                      | 0.132        | 0.290 to 0.809        | 0.694         |                    | 0.646              | 0.123        | 0.405 to 0.886       | 0.260        |                    | 0.6231                  | 0.1264    | 0.3752 to 0.8709 | 0.3211  |
| <b>OEA</b>   | <b>0.94</b>               | <b>0.047</b> | <b>0.845 to 1.03</b>  | <b>0.0003</b> | <b>&gt; 4.870</b>  | <b>0.893</b>       | <b>0.088</b> | <b>0.721 to 1.07</b> | <b>0.002</b> | <b>&gt; 5.015</b>  | 0.6846                  | 0.1157    | 0.4578 to 0.9114 | 0.1367  |
| <b>PEA</b>   | <b>0.86</b>               | <b>0.075</b> | <b>0.709 to 1.00</b>  | <b>0.003</b>  | <b>&gt; 7.900</b>  | <b>0.901</b>       | <b>0.087</b> | <b>0.730 to 1.07</b> | <b>0.001</b> | <b>&gt; 7.920</b>  | 0.7308                  | 0.1051    | 0.5248 to 0.9367 | 0.06287 |
| <b>DEA</b>   | <b>0.909</b>              | <b>0.065</b> | <b>0.782 to 1.04</b>  | <b>0.001</b>  | <b>&gt; 0.3300</b> | <b>0.860</b>       | <b>0.092</b> | <b>0.678 to 1.04</b> | <b>0.004</b> |                    | 0.5923                  | 0.1281    | 0.3411 to 0.8435 | 0.4568  |
| <b>NAGLy</b> | 0.657                     | 0.117        | 0.428 to 0.886        | 0.192         |                    | 0.711              | 0.119        | 0.477 to 0.944       | 0.094        |                    | 0.6014                  | 0.125     | 0.3563 to 0.8465 | 0.4009  |
| <b>EPEA</b>  | <b>0.860</b>              | <b>0.083</b> | <b>0.698 to 1.02</b>  | <b>0.003</b>  | <b>&gt; 0.0950</b> | <b>0.855</b>       | <b>0.090</b> | <b>0.679 to 1.03</b> | <b>0.005</b> | <b>&gt; 0.0850</b> | 0.5594                  | 0.1269    | 0.3107 to 0.8082 | 0.6224  |
| <b>DHEA</b>  | <b>0.90</b>               | <b>0.065</b> | <b>0.774 to 1.03</b>  | <b>0.002</b>  | <b>&gt; 0.4350</b> | <b>0.838</b>       | <b>0.098</b> | <b>0.647 to 1.03</b> | <b>0.011</b> | <b>&gt; 0.8250</b> | 0.528                   | 0.1263    | 0.2804 to 0.7755 | 0.8167  |
| <b>POEA</b>  | <b>0.76</b>               | <b>0.107</b> | <b>0.549 to 0.966</b> | <b>0.036</b>  | <b>&gt; 0.1700</b> | 0.723              | 0.112        | 0.505 to 0.942       | 0.076        | <b>&gt; 0.1800</b> | 0.535                   | 0.1273    | 0.2854 to 0.7845 | 0.7721  |
| <b>LEA</b>   | 0.62                      | 0.117        | 0.392 to 0.853        | 0.311         |                    | 0.537              | 0.127        | 0.289 to 0.786       | 0.768        |                    | 0.5804                  | 0.1213    | 0.3427 to 0.8181 | 0.5053  |

|                            |      |       |                   |       |  |       |       |                   |       |  |        |        |                     |        |
|----------------------------|------|-------|-------------------|-------|--|-------|-------|-------------------|-------|--|--------|--------|---------------------|--------|
| <b>PGF<sub>2α</sub>-EA</b> | 0.62 | 0.117 | 0.389 to<br>0.848 | 0.325 |  | 0.632 | 0.127 | 0.384 to<br>0.880 | 0.294 |  | 0.514  | 0.1237 | 0.2715 to<br>0.7565 | 0.9078 |
| <b>PGE<sub>2</sub>-EA</b>  | 0.52 | 0.125 | 0.279 to<br>0.768 | 0.852 |  | 0.509 | 0.138 | 0.239 to<br>0.779 | 0.944 |  | 0.5105 | 0.1328 | 0.2502 to<br>0.7708 | 0.9308 |
